# Supplementary figures and images for: Construction of an interpenetrated 3-D network by [2 + 2] cycloaddition of Zn(ClO4)2 and 1,2-trans-(4-pyridyl)ethene: counter anion effects
Source: Royal Society of Chemistry journal article supplement (doi:10.1039/b511520e), 2005-01-01

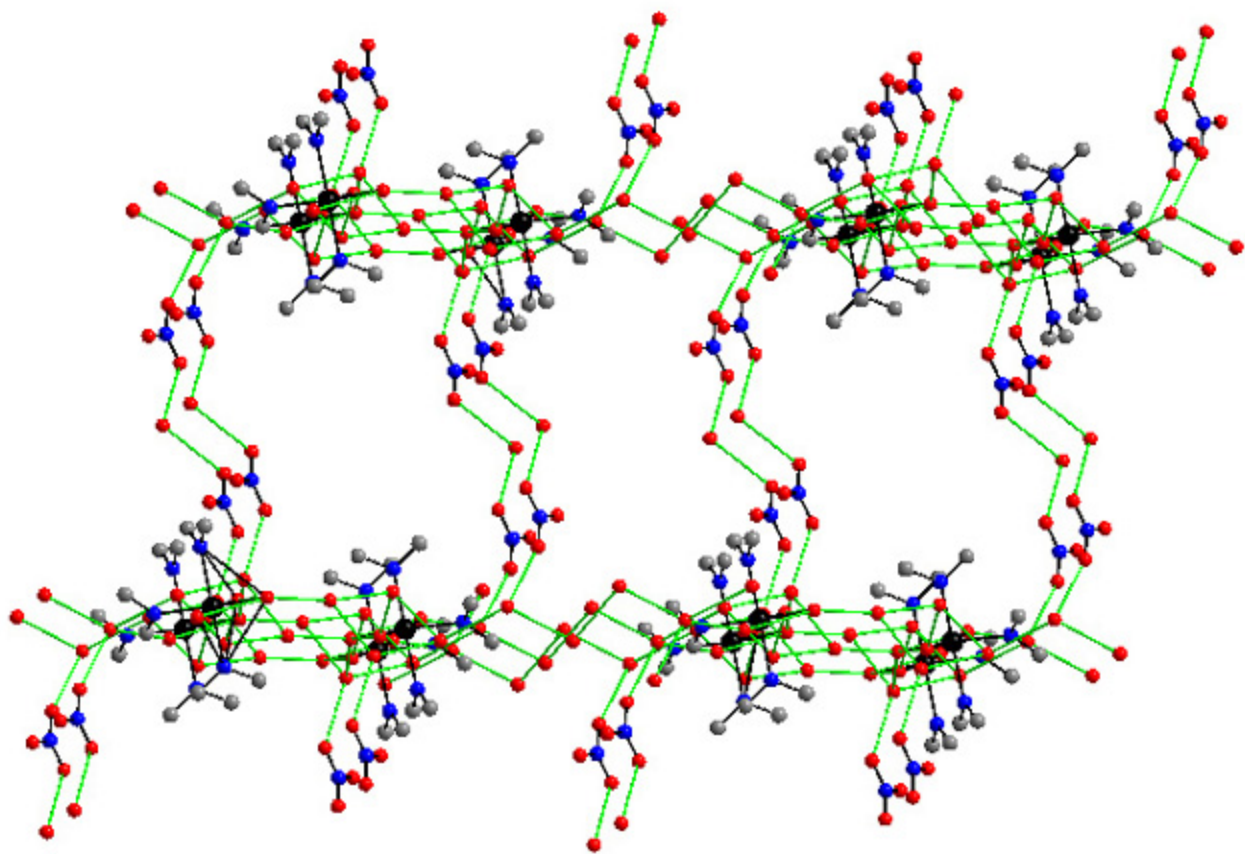

S-1. Assembly of water molecules with nitrate anions in compound **2**.

Supplement: b511520e1.pdf [file b511520e1.pdf]

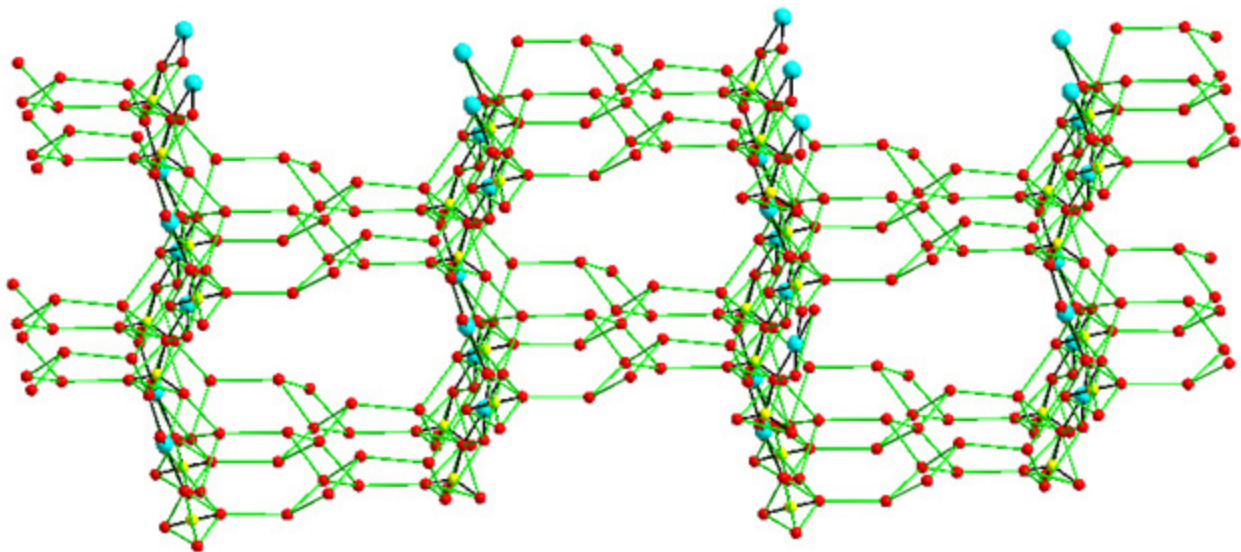

S-2. Assembly of water molecules with sulfate anions in compound 3.

Supplement: b511520e2.pdf [file b511520e2.pdf]
